# Supplementary material for: A novel fluorescent probe of aluminium ions based on rhodamine derivatives and its application in biological imaging
Source: Royal Society of Chemistry journal article supplement (doi:10.1039/d1nj01184g), 2021-01-01
Supplement: d1nj01184g1.pdf [file d1nj01184g1.pdf]

# **A novel fluorescent probe of aluminium ions based on rhodamine derivatives and its application in biological imaging**

Chun Kan<sup>\*a1</sup>, Xing Wang<sup>a1</sup>, Xiaotao Shao<sup>a</sup>, Linyun Wu<sup>a</sup>, Siyan Qiu<sup>b</sup> and Jing Zhu<sup>b</sup>

<sup>a</sup> *College of Science, Department of Chemistry and Material Science, Nanjing Forestry University, 159 Longpan Road, Nanjing 210037, China*

<sup>b</sup> *Department of Pharmacy, Jiangsu Key Laboratory for Pharmacology and Safety Evaluation of Chinese Materia Medica, Nanjing University of Chinese Medicine, 138 Xianlin Dadao, Nanjing 210023, China*

## **Contents**

|                                              |           |
|----------------------------------------------|-----------|
| <b>1. NMR and MS spectra .....</b>           | <b>S1</b> |
| <b>2. Experiment methods and graphs.....</b> | <b>S2</b> |

# 1. NMR and MS spectra

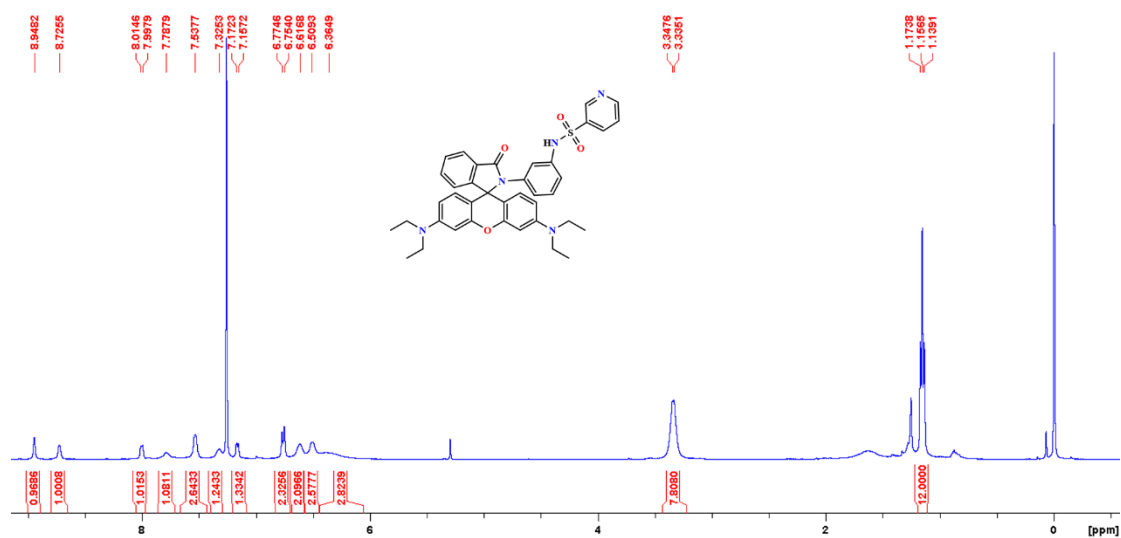

Fig. S1. <sup>1</sup>H NMR (CDCl<sub>3</sub>, 400 MHz) spectra of compound RBJF.

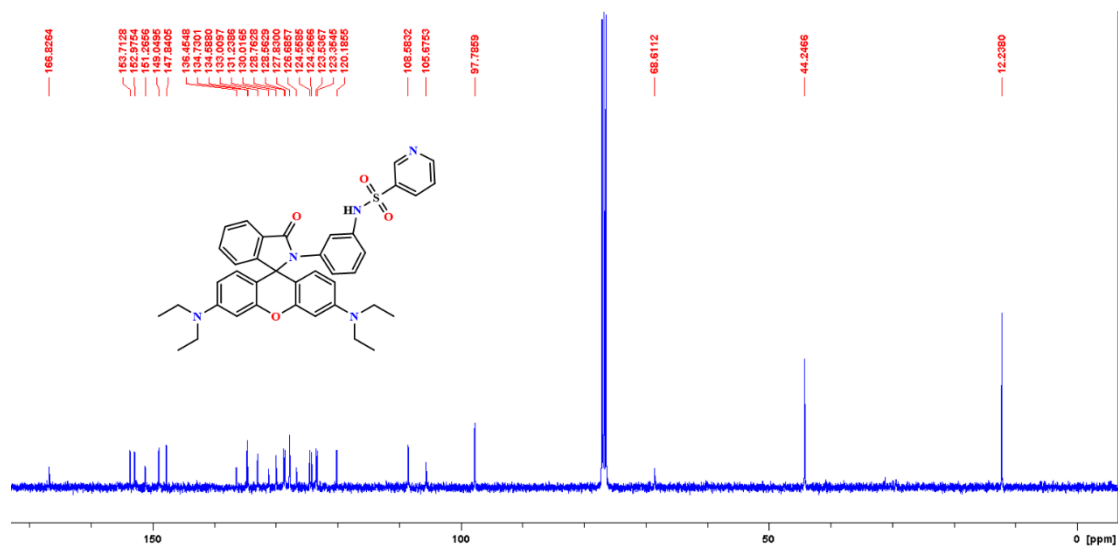

Fig. S2. <sup>13</sup>C NMR (CDCl<sub>3</sub>, 600 MHz) spectra of compound RBJF.

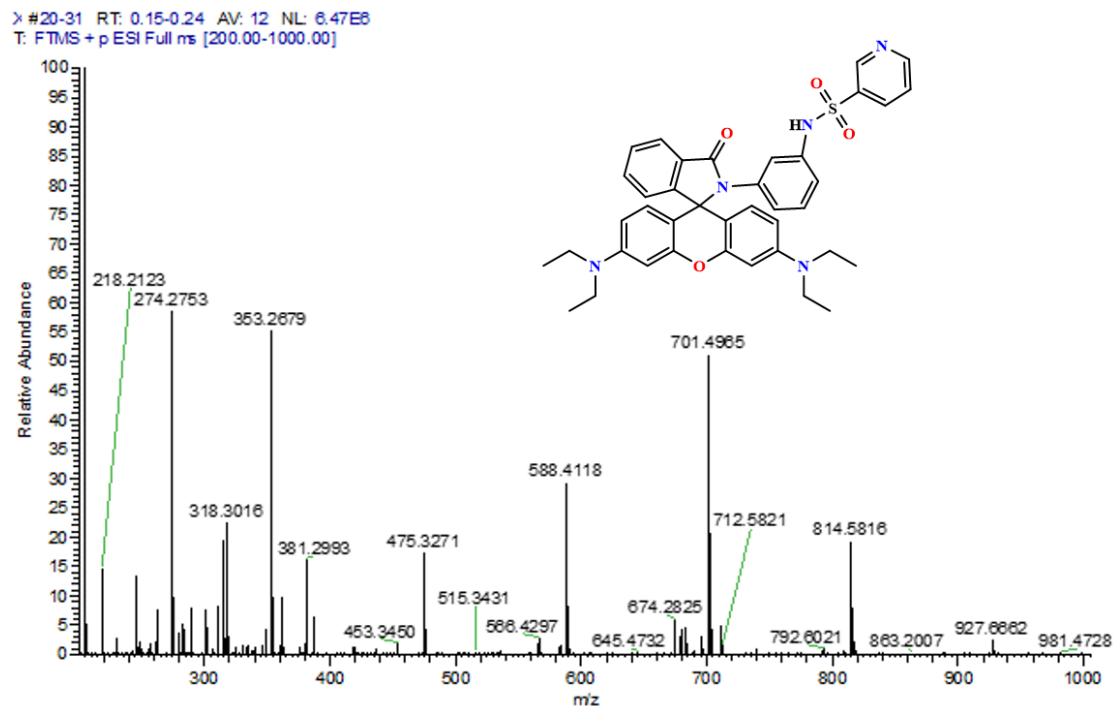

Fig. S3. ESI-MS spectrum of compound **RBJF**.

## 2. Experiment methods and graphs

### Calculation of association constant

The association constant ( $K_a$ ) of **RBJF**- $Al^{3+}$  complex was determined by Benesi-Hildebrand Formula (1):

$$\Delta F = F - F_0 = \Delta F = \Delta F = [Al^{3+}](F_{max} - F_0) / (1/K_a + [Al^{3+}])$$

Where  $F$  is the fluorescence intensity at 582 nm upon addition of different concentration of  $Al^{3+}$ ,  $F_0$  is the fluorescence intensity at 582 nm in the absence of  $Al^{3+}$  and  $F_{max}$  is the saturated intensity at 582 nm in the presence of  $Al^{3+}$ . The association constant ( $K_a$ ) was evaluated graphically by plotting  $1/[F-F_0]$  against  $1/[Al^{3+}]$ . Linear fit to the data according to the formula (1), through the slope and intercept, the binding constant of **RBJF** was calculated as  $0.455 \times 10^4 M^{-1}$ .

### Determination of detection limit

According fluorescence titration experiments, we can also calculate the detection limit of **RBJF** for  $Al^{3+}$ . The fluorescence intensity of the blank samples was measured for 10 times, calculate the standard deviation of the fluorescence intensity at 582 nm. Then, make a curve based on the fluorescence intensity of **RBJF** at 582 nm and the concentration of  $Al^{3+}$  to obtain the slope. The detection limit was calculated according to the following formula:

$$\text{Detection limit} = \frac{3SD}{S} \quad SD = \sqrt{\frac{1}{N-1} \sum_{i=1}^N (X_i - \bar{X})^2} \quad (2)$$

Where  $SD$  is the standard deviation of the blank solution detected for 10 times;  $S$  is the slope of the calibration curve. Finally, the detection limit of **RBJF** is calculated to be  $0.314 \mu M$ .

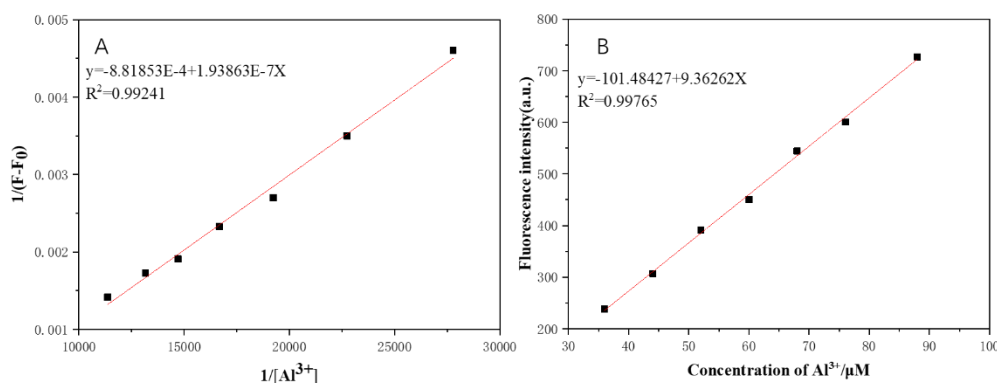

Fig. S4. (A) Benesi-Hildebrand plot ( $\lambda_{em} = 582$  nm) of  $1/(F-F_0)$  vs  $1/[Al^{3+}]$ . (B) Fluorescent intensity at 582 nm of **RBJF** (10  $\mu M$ ) in EtOH/H<sub>2</sub>O solution (1:2, v/v) with different amounts of  $Al^{3+}$ . The excitation wavelength is 520 nm.

#### MTT method

MTT method was used to perform cytotoxicity test to detect cell survival and growth. We used human breast cancer cells (MCF-7) as the experimental cells. MCF-7 cells were placed in a 96-well plate and placed in atmosphere at 310.15K and 5% CO<sub>2</sub> for 12 hours. Take the supernatant and add probe culture solution of different concentrations, then take the supernatant and add 5mg/mL MTT stock solution and leave it for 4h. Finally, take the supernatant again, add 150  $\mu L$  DMSO to each well plate. The absorbance of each well was measured at 550 nm using a microplate reader (Bio-Rad, Model 550). The experiment was repeated three times to get the average value. We selected human breast cancer cell (MCF-7) cells as the cells used for imaging experiments. MCF-7 cells were placed in high glucose medium supplemented with 10% FBS (fetal bovine serum), 100 units/mL penicillin and 100 units/mL streptomycin temperature streptomycin in high glucose medium. The temperature was 310.15K, and the culture environment was in an air atmosphere of 5% CO<sub>2</sub>. MCF-7 cells incubated in the incubator were seeded in 24-well plates at  $1.5 \times 10^5$  cells per well. Six hours after the probe **RBJF** was added, the cells were washed three times with PBS and live-cell imaging was performed. In addition, pretreatment with 20  $\mu M$   $Al^{3+}$  for 1h, and then adding 10  $\mu M$  probe **RBJF** for 5h as a control group. Fluorescence images of cells were recorded under an inverted fluorescent microscope.

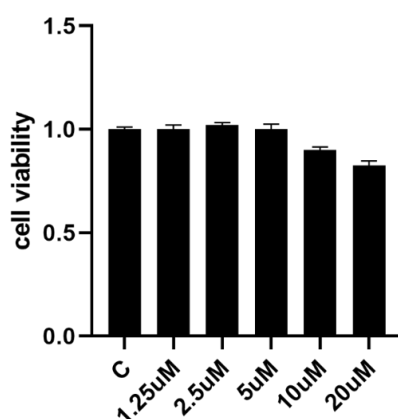

Fig. S5. Cytotoxicity assay of probe **RBJF** for MCF-7 cells by the MTT test. MCF-7 cells were respectively cultured in the presence of different concentrations of **RBJF** (1.25, 2.5, 5, 10, and 20  $\mu M$ ) at 310.15K for 24h. For the control group, MCF-7 cells were incubated under the same conditions but without the probe **RBJF**.

Compared the LOD

| Probe structures                                                                    | Reagents                                        | Detection Limit / $\mu\text{M}$ | References                                                                                                                                                             |
|-------------------------------------------------------------------------------------|-------------------------------------------------|---------------------------------|------------------------------------------------------------------------------------------------------------------------------------------------------------------------|
| 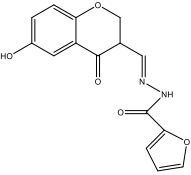   | EtOH                                            | 0.0387                          | C. R. Li, J. C. Qin, B. D. Wang, L. Fan, J. Yan and Z. Y. Yang, <i>J Fluoresc</i> , 2016, 26, 345-353.                                                                 |
|    | near 100% aqueous media (Tris-HCl, pH 7.2)      | 0.4                             | J.-c. Qin, Z.-y. Yang and P. Yang, <i>Inorganica Chimica Acta</i> , 2015, 432, 136-141.                                                                                |
|    | EtOH-H <sub>2</sub> O (4:1, v/v)                | 0.11                            | S. Mabhai, M. Dolai, S. Dey, A. Dhara, B. Das and A. Jana, <i>New Journal of Chemistry</i> , 2018, 42, 10191-10201.                                                    |
|   | DMF/H <sub>2</sub> O (1/9, v/v)                 | 0.0367                          | S. Zeng, S. J. Li, X. J. Sun, M. Q. Li, Y. Q. Ma, Z. Y. Xing and J. L. Li, <i>Spectrochim Acta A Mol Biomol Spectrosc</i> , 2018, 205, 276-286.                        |
|  | ACN/H <sub>2</sub> O (1/1, v/v)                 | 4.4                             | D. Aydin, E. Karakilic, S. Karakurt and A. Baran, <i>Spectrochim Acta A Mol Biomol Spectrosc</i> , 2020, 238, 118431.                                                  |
|  | H <sub>2</sub> O: CH <sub>3</sub> CN (3:7, v/v) | 0.572                           | A. Raj, A. K. Singh, K. Tripathi, A. K. Sonkar, B. S. Chauhan, S. Srikrishna, T. D. James and L. Mishra, <i>Sensors and Actuators B: Chemical</i> , 2018, 266, 95-105. |
|  | MeOH/H <sub>2</sub> O (1:1, v/v)                | 0.314                           | This work                                                                                                                                                              |
